# Supplementary material for: Coupling the liquid sampling – atmospheric pressure glow discharge, a combined atomic and molecular (CAM) ionization source, to a reduced-format mass spectrometer for the analysis of diverse species
Source: Royal Society of Chemistry journal article supplement (doi:10.1039/d0ja00094a), 2020-01-01
Supplement: d0ja00094a1.pdf [file d0ja00094a1.pdf]

**Electronic Supplementary Information**

**for**

**Coupling the Liquid Sampling – Atmospheric Pressure Glow  
Discharge, a Combined Atomic and Molecular (CAM)  
Ionization Source, to a Reduced-Format Mass Spectrometer  
for the Analysis of Diverse Species**

Tyler J. Williams and R. Kenneth Marcus\*

Clemson University, Department of Chemistry, Clemson, SC 29634

\*Author to whom correspondence should be addressed

Submitted for publication in the Journal of Analytical Atomic Spectrometry

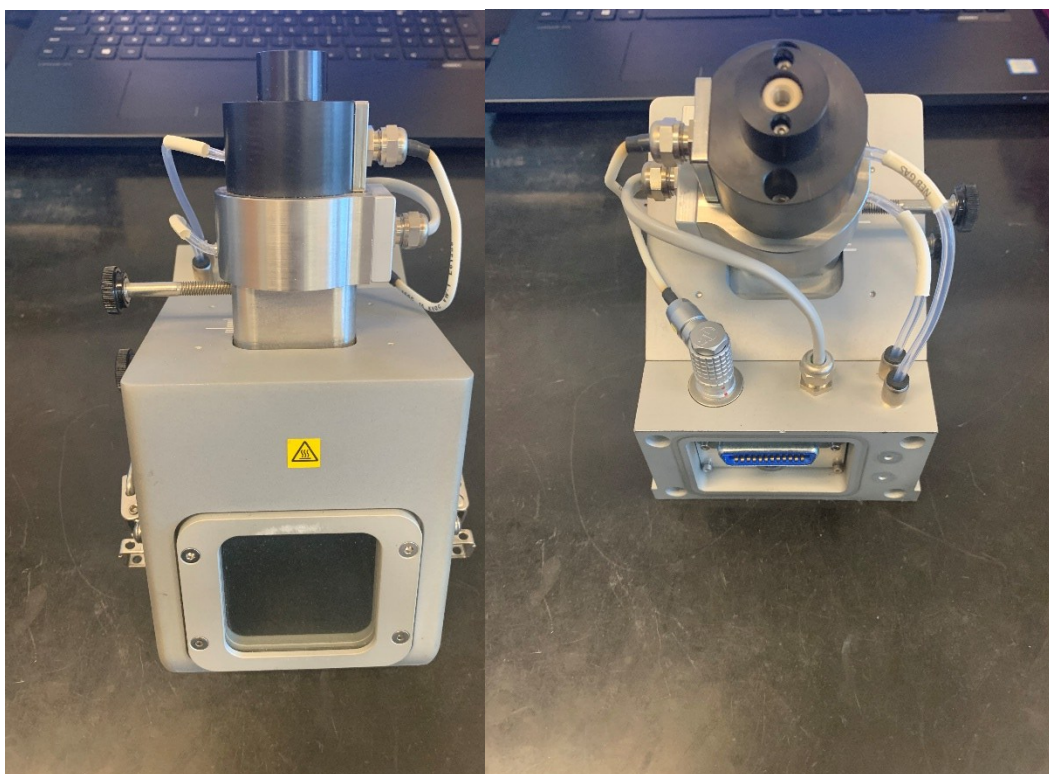

Figure S1: a) front view and b) back view of the standard Advion ESI source

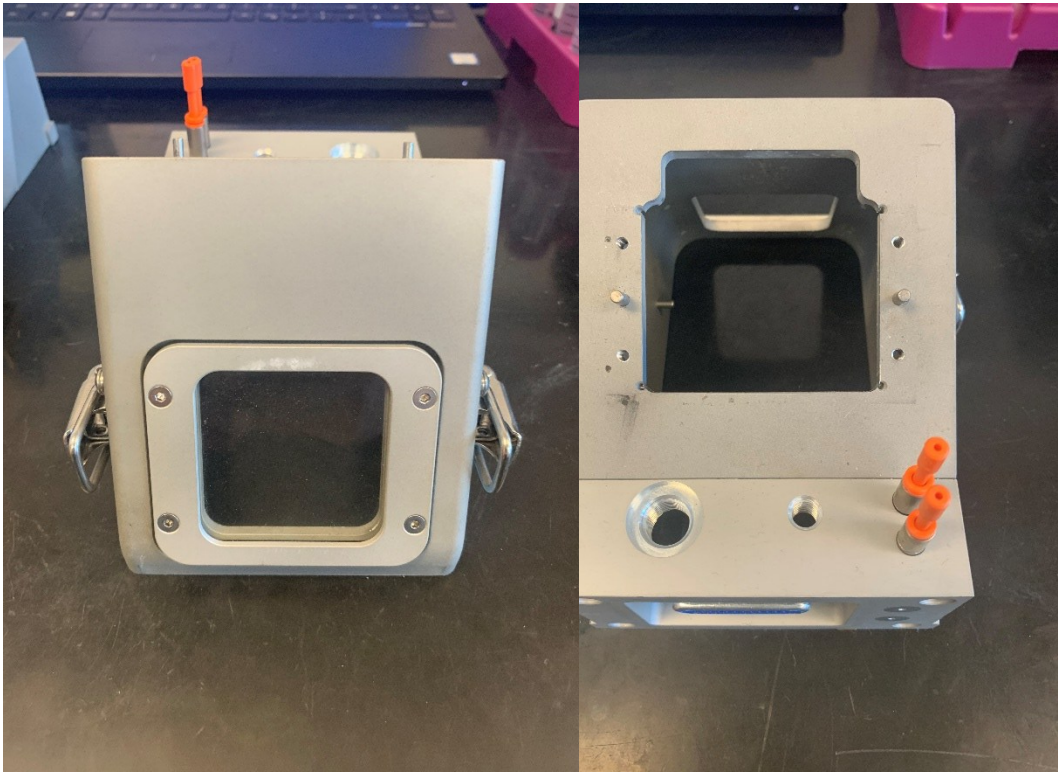

Figure S2: a) front view and b) back view of the standard Advion ESI source with modifications made to house the LS-APGD. Simply, the hole that the ESI probe sits in has been widened.

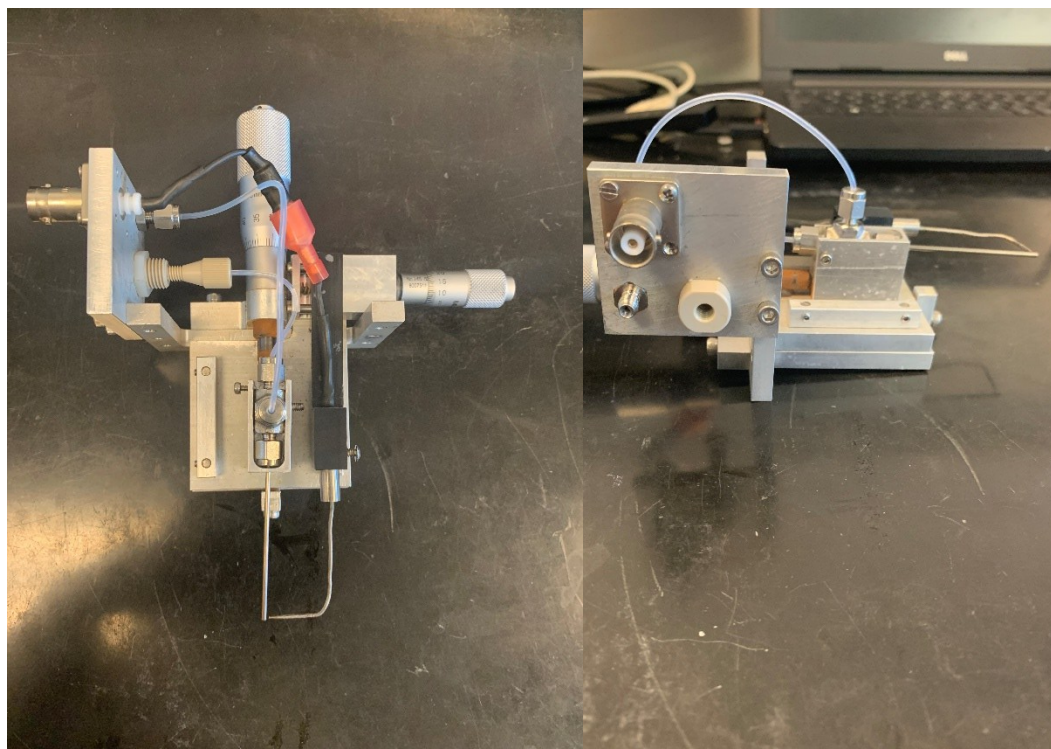

Figure S3: a) Top down view of the LS-APGD chip designed to fit into the modified Advion ESI housing. The electrodes were placed on a moving stage with a micrometer (Thorlabs, Newton, NJ) to adjust the distance from the sampling cone. The counter electrode has an additional micrometer to control the interelectrode displacement. B) side view of the LS-APGD chip showing the connection for power, liquid, and gas from the control box

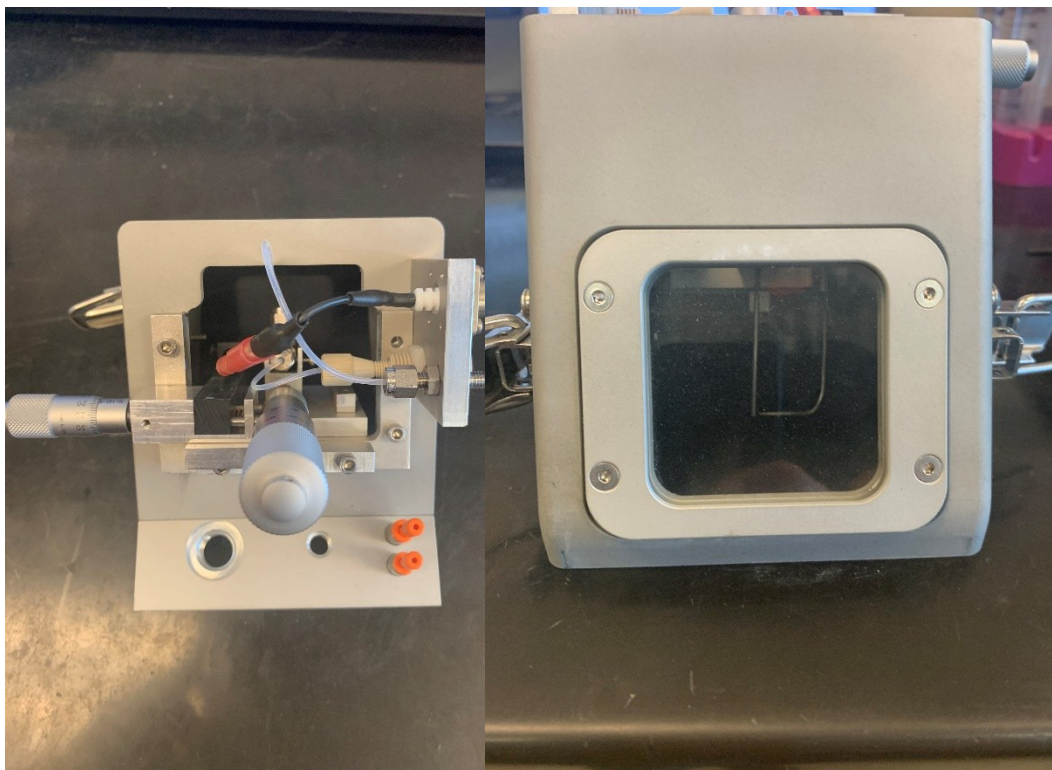

Figure S4: a) top view of the LS-APGD fit into the modified Advion ESI housing. The chip simply slides into the housing and is held into place with a screw on either side. B) front view through the window of the source housing showing the electrodes seated in the housing

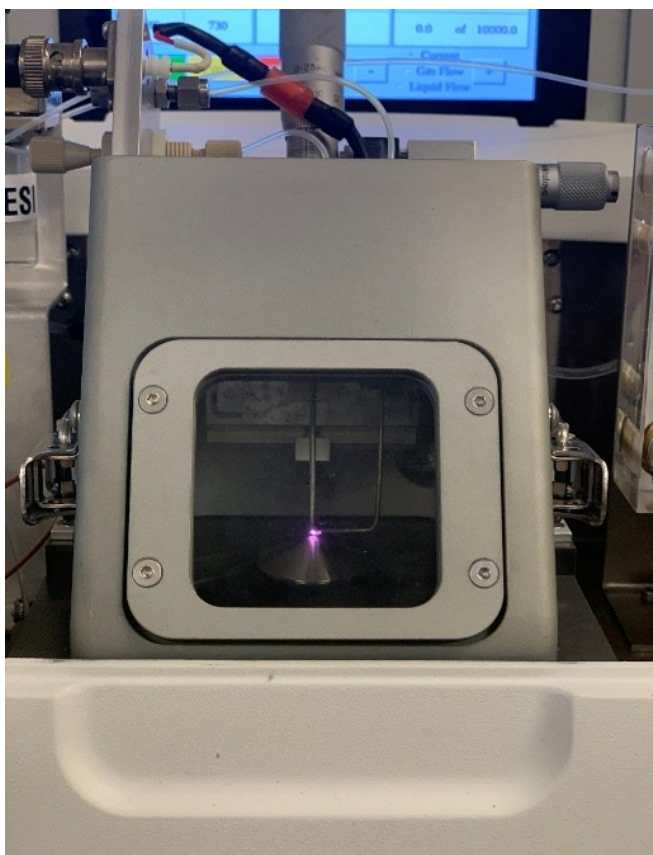

Figure S5: Picture of the LS-APGD fit into the modified ESI housing and interfaced with then interfaced with the CMS.

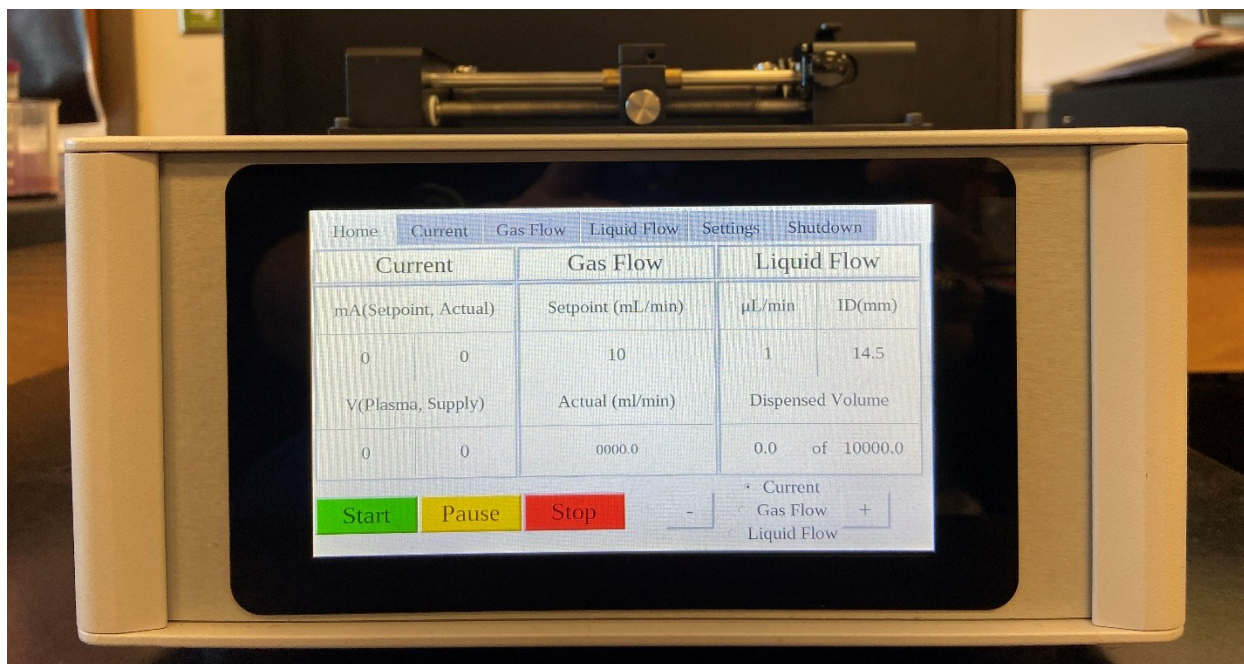

Figure S6: Control box utilized by the LS-APGD. This box controls the discharge current, gas flow, liquid flow, and the auto ignition system. All parameters are controlled through a touch screen interface.
